# Supplementary material for: Transcription factor regulation of eQTL activity across individuals and tissues
Source: PubMed Central journal article supplement (PMC8830792; doi:10.1371/journal.pgen.1009719), 2022-01-31
Supplement: pgen.1009719.s025.pdf [file pgen.1009719.s025.pdf]

The manuscript from Flynn et al. utilizes publicly available data to identify interactions between transcription factor (TF) expression/binding and eQTLs. The authors primarily leverage the GTEx dataset - an initiative led in part by the lead author Dr. Lappalainen. The authors identify a number of eQTLs with effect sizes correlated with TF expression either across individuals/within a tissue or across tissues. They also perform similar analyses with protein levels of TFs - although these were less fruitful. The authors characterize the degree of sharing and genomic features of TF-eQTLs. The authors use a previously published CRISPRi experiment to validate the findings of eQTL interactions with IRF1, and compare use a published dataset of GxE eQTLs to demonstrate how TF-eQTLs may be driving context-specific QTLs. Finally, the authors overlap TF-eQTLs with GWAS variants to demonstrate how TF-eQTLs may contribute to complex traits. Overall the findings of this study are of broad interest to the genomics community - particularly the functional genomics community. The authors do a reasonable job of contextualizing these results and the methods are well described - along with the github code being publicly available. I have no major concerns with this manuscript in the current form, but have a small number of questions/comments that I suggest the authors address.

- 1) FDR. The “most” major of my comments is around FDR. The authors vary FDR cut offs for significance depending on the analysis - e.g. using 20% for the first analysis of TF-eQTLs within tissues (line 143) and then 5% across tissues (line 174). The authors should either select a single cut off OR justify why it is appropriate to vary these cutoffs.
- 2) I’m a bit confused by the X cell results. It seems strange that one of the tissues with the highest variance in cell-type composition between individuals is cultured fibroblasts. These cultures should be relatively pure as fibroblasts grow very rapidly and robustly. Additionally, the variable cell-type Th2 doesn’t make a lot of sense to me - particularly not at a mean frequency of 25% (if I’m reading the X axis of Fig. S5 correctly).
- 3) On lines 162 and in Fig. 2C I’m not sure what negative enrichment means. Is this a depletion? I also found that Fig. 2C was a bit hard to interpret in the context of the text. The two rows at the top of the heatmap are not explained - these are also the only places where a blue (negative enrichment) square was found. I’m not sure how to link what is said around line 162 to what I am seeing in Fig. 2C.
- 4) Somewhat pedantic, but in the manuscript you move from Fig. 2A to Fig. 2C and do not include Fig. 2B until later in the paper.
- 5) On line 164 the authors reference the clustering of within tissue TF-eQTL relations looks similar to tissue gene expression, but they do not show clustering data for TF-eQTLs - Sfig. 3 only shows expression data.
- 6) The only place the methods and text where a bit unclear was when the authors describe the SNP set for the aFC analysis. The authors state in the main text they use the “filtered variant-gene pair” and in the methods they state they use “all eVariant-eGene pairs”. In the main text the authors also state “by ignoring eQTL significance cutoffs”. It was not clear what significance cutoff was ignored - the initial eQTL significance? Some clarity here would be helpful!
- 7) In the annotation and TF-binding of TF-eQTL interactions section the authors describe how TF-eQTLs are more likely to overlap a TFBS of their interacting TF, but also state they fall into the regulon of that TF. It wasn’t clear how regulons were defined.
- 8) Lastly the authors use TF-eQTL throughout the text and figures, but the meaning of this changes somewhat depending on the section - e.g. in Fig. 5 TF-eQTL actually means dual evidence TF-eQTL while in other sections it means only cross tissue or only within tissue etc.
